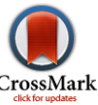

# Rapid and Simultaneous Quantification of Levetiracetam and Its Carboxylic Metabolite in Human Plasma by Liquid Chromatography Tandem Mass Spectrometry

Li-Ling Yeap\*, Yoke-Lin Lo

Department of Pharmacy, Faculty of Medicine, University of Malaya, Kuala Lumpur, Malaysia

## Abstract

A simple liquid chromatography tandem mass spectrometry method was developed and validated according to the guidelines of the US Food and Drug Administration and the European Medicines Agency for a simultaneous quantification of levetiracetam (LEV) and its metabolite, UCB L057 in the plasma of patients. A 0.050 mL plasma sample was prepared by a simple and direct protein precipitation with 0.450 mL acetonitrile (ACN) containing 1 µg/mL of internal standard (IS, diphenhydramine), then vortex mixed and centrifuged. A 0.100 mL of the clear supernatant was diluted with 0.400 mL water and well mixed. A 0.010 mL of the resultant solution was injected into an Agilent Zorbax SB-C18 (2.1 mm × 100 mm, 3.5 µm) column with an isocratic elution at 0.5 mL/min using a mixture of 0.1% formic acid in water and ACN (40:60 v/v). Detection was performed using an AB Sciex API 3000 triple quadrupole mass spectrometer, equipped with a Turbo Ion Spray source, operating in a positive mode: LEV at transition 171.1 > 154.1, UCB L057 at 172.5 > 126.1, and IS at 256.3 > 167.3; with an assay run time of 2 minutes. The lower limit of quantification (LLOQ) for both LEV and UCB L057 was validated at 0.5 µg/mL, while their lower limit of detection (LOD) was 0.25 µg/mL. The calibration curves were linear between 0.5 and 100 µg/mL for both analytes. The inaccuracy and imprecision of both intra-assay and inter-assay were less than 10%. Matrix effects were consistent between sources of plasma and the recoveries of all compounds were between 100% and 110%. Stability was established under various storage and processing conditions. The carryovers from both LEV and UCB L057 were less than 6% of the LLOQ and 0.13% of the IS. This assay method has been successfully applied to a population pharmacokinetic study of LEV in patients with epilepsy.

**Citation:** Yeap L-L, Lo Y-L (2014) Rapid and Simultaneous Quantification of Levetiracetam and Its Carboxylic Metabolite in Human Plasma by Liquid Chromatography Tandem Mass Spectrometry. PLoS ONE 9(11): e111544. doi:10.1371/journal.pone.0111544

**Editor:** Tony Wang, SRI International, United States of America

**Received:** June 12, 2014; **Accepted:** August 29, 2014; **Published:** November 6, 2014

**Copyright:** © 2014 Yeap, Lo. This is an open-access article distributed under the terms of the Creative Commons Attribution License, which permits unrestricted use, distribution, and reproduction in any medium, provided the original author and source are credited.

**Data Availability:** The authors confirm that all data underlying the findings are fully available without restriction. All data pertaining the development and validation of the LC-MS/MS assay method of LEV and UCB L057 are within the paper and its Supporting Information File. The raw data on plasma LEV and UCB L057 concentrations vs. time after last dose of 6 sample patients are available in the Supporting Information File. All other data have been deposited to Figshare and are available at: <http://dx.doi.org/10.6084/m9.figshare.1171055>.

**Funding:** This study is supported financially by the Ministry of Higher Education, Malaysia under High Impact Research grant. The grant number is UM.C/HIR/MOHE/H-20001-00-E000038. The grant was awarded to YLL. The funder had no role in study design, data collection and analysis, decision to publish, or preparation of the manuscript.

**Competing Interests:** The authors have declared that no competing interests exist.

\* Email: [lilingyeap@gmail.com](mailto:lilingyeap@gmail.com)

## Introduction

Levetiracetam [(S)- $\alpha$ -ethyl-2-oxo-1-pyrrolidine acetamide) or Keppra (UCB Inc, Smyrna, GA)] has been used as an adjunct or monotherapy in adults with partial onset seizures, with or without secondary generalization. Due to its efficacy and tolerability, the indications of levetiracetam have now been expanded to younger patients with a wider spectrum of epileptic syndromes such as myoclonic seizures and primary generalized tonic-clonic seizures [1].

Levetiracetam (LEV) is rapidly and completely absorbed after an oral administration. The drug has a linear pharmacokinetics with a minimum or no protein binding [2]. It does not undergo hepatic metabolism via cytochrome P450 and therefore has few drug-drug interactions [2–4]. Levetiracetam is converted to etiracetam carboxylic acid (UCB L057), an inactive metabolite via hydrolysis in the blood by beta-esterases [5]. About 66% of the absorbed dose is excreted unchanged in urine and 24% in its acid

metabolite (UCB L057) form [4]. The elimination half-life of LEV is between 6 and 8 hours in adults with normal renal function, between 9 and 11 hours in elderly and 5 and 7 hours in children. The elimination half-life of LEV is prolonged in renal impairment, therefore dosage adjustment may be needed in patients with chronic kidney diseases or acute kidney injury.

Although LEV is recognized for its tolerability and ease of dosing due to its almost ideal pharmacokinetic profile, monitoring of serum or plasma concentrations of LEV may be useful in patients with altered physiological states; for example, in geriatric patients, pediatric patients or pregnant women; as well as in situations such as determining drug adherence, overdose or drug-induced adverse effects. Moreover, the co-administration with other inducers or inhibitors of cytochrome P450 enzymes has been reported to alter LEV serum concentrations [6–8].

A large between subject variability in the ratio of LEV serum concentrations to LEV dose/kg body weight; and LEV serum concentration-effect relationship has also been reported [6,9].

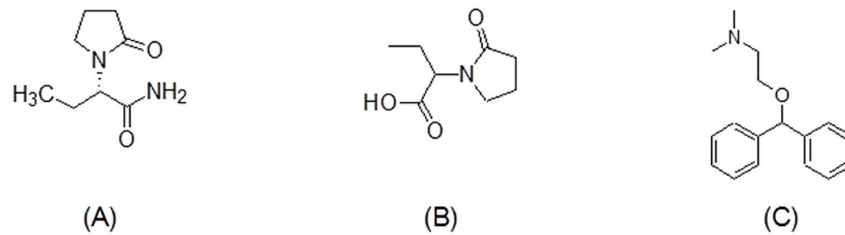

**Figure 1. Molecular structures of (A) Levetiracetam (molecular weight 170.2), (B) Etiracetam carboxylic acid (molecular weight 171.2) and (C) Diphenhydramine (molecular weight 255.4).**

doi:10.1371/journal.pone.0111544.g001

Recently, Kauffman *et al.* [10] reported a probable association of LEV dose or plasma concentrations to mood disorders. The therapeutic range of LEV has not been distinctly defined, but a trough level of between 12 and 46  $\mu\text{g}/\text{mL}$  or between 70 and 270  $\mu\text{mol}/\text{mL}$  was suggested [11].

A number of laboratory methods such as immunoassay [12], high performance liquid chromatography with UV detection [9,13–24], gas chromatography with mass spectrometry detection [25,26], gas chromatography with nitrogen phosphorus detection [23,27,28], capillary electrophoresis with UV detection [29], high performance thin layer chromatography [15], high-performance liquid chromatography tandem mass spectrometry [15,30–36] and ultra-performance liquid chromatography tandem mass spectrometry [37–40] have been described for measuring LEV in biological matrices. Some of these assay methods however, may require large sample volumes [14,15,17,39], tedious extraction procedures using solid-phase extraction [13,14,16,33] or liquid-liquid extraction [9,14,19,22,39] or a lengthy chromatographic run time of 10 minutes or longer, for an analysis of a single analyte [9,16,17,19,22]. Moreover, these assay methods mainly focus on the quantification of LEV, either alone or together with other antiepileptic drugs.

Although it is not crucial to measure an inactive metabolite in a pharmacokinetic-pharmacodynamic study, a falsely higher measured LEV concentrations may result if LEV was not separated either chromatographically or mass spectrometrically from UCB L057 during a quantification process [32]. Both compounds might co-elute as their molecular weights differ only by 1 mu and they also share a similar daughter ion of 126 mu which is often used for the quantification of LEV [15,32–35,37,39,40].

To date, there is only one published assay method that measures the plasma concentrations of LEV and UCB L057 simultaneously by altering the pH of the mobile phase using a gradient elution [32]. Previous exploratory pharmacokinetic studies of LEV have employed two distinct analytical methods of GS-MS and

LC-ESI-MS to quantify the plasma concentrations of LEV and UCB L057 respectively [27,28,41]. The objective of this present work is to develop and validate a simple LC-MS/MS method for a simultaneous quantification of LEV and UCB L057 in the plasma of patients treated with LEV for seizure control in a population pharmacokinetic study.

## Materials and Methods

### 2.1 Reagents, internal standard, calibrators and quality control samples

Pure compounds of LEV (purity  $\geq 98\%$ ) and UCB L057 (purity 98%) were purchased from Sigma-Aldrich (Missouri, USA) and Toronto Research Chemical (Ontario, Canada), respectively. Internal standard (IS), diphenhydramine (DPH) is a gift from Pharamaniaga Ltd (Selangor, Malaysia). The molecular structures of LEV, UCB L057 and DPH are displayed in Figure 1.

HPLC-grade acetonitrile (ACN) and HPLC-grade methanol were purchased from Fisher Scientific (Leicester, UK). Formic acid 98% was purchased from Acros Organic (New Jersey, USA). All water was distilled and purified with a Sartorius Reverse Osmosis Arium, RO 61316 system and Elga Purelab UHQ, UHQ-PS-MK3 (18 M $\Omega$ ). Drug-free, human plasma was supplied by the Transfusion Unit of University of Malaya Medical Centre (Kuala Lumpur, Malaysia).

Both the stock solutions of LEV and UCB L057 were prepared at 5.000 mg/mL and the working solution of IS at DPH 1.000 mg/mL in methanol/UHQ water (50:50 v/v). Separate stock solutions were used to prepare calibration standards (references) and quality control (QC) samples. A set of calibrators at concentrations of 0.5, 5, 10, 40, 60, 80 and 100  $\mu\text{g}/\text{mL}$  and QC standards at concentrations of 1.5, 50 and 90  $\mu\text{g}/\text{mL}$ , were prepared with each series, by spiking pooled blank human plasma with an appropriate stock solution. The amount of stock solutions added to the plasma did not exceed 3% of the total volume.

**Table 1. Optimized mass spectrometer voltage settings including MS/MS transitions for all analytes evaluated.**

| Analyte  | Q1/Q3 transitions (m/z), precursor ion > product ion | DP (V) | FP (V) | CE (V) | CXP (V) | EP (V) | Dwell time (msec) | Retention time (min) |
|----------|------------------------------------------------------|--------|--------|--------|---------|--------|-------------------|----------------------|
| LEV      | 171.1 > 154.1                                        | 18     | 213    | 11     | 15      | 10     | 100               | 0.58                 |
| UCB L057 | 172.5 > 126.1                                        | 26     | 213    | 18     | 15      | 10     | 100               | 0.61                 |
| IS       | 256.3 > 167.3                                        | 17     | 213    | 20     | 15      | 10     | 100               | 0.82                 |

DP = declustering potential, FP = focusing potential, CE = collision energy, CXP = collision cell exit potential and EP = entrance potential.

doi:10.1371/journal.pone.0111544.t001

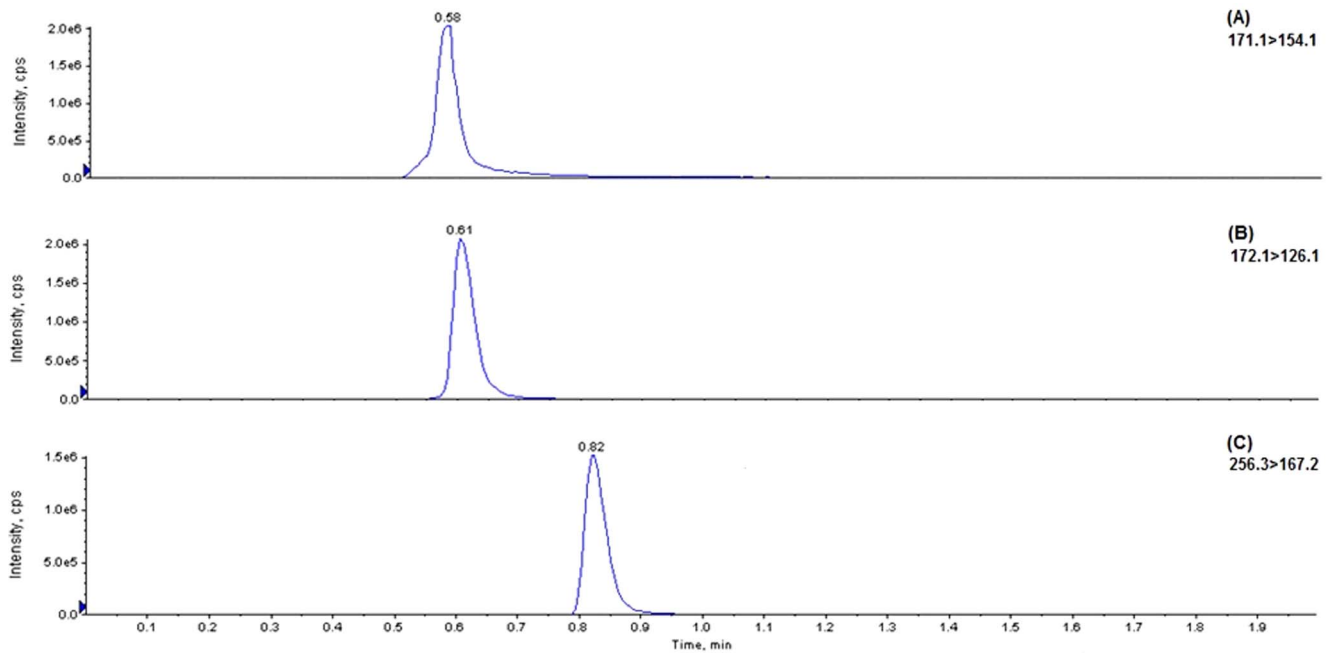

**Figure 2. Chromatograms of extracted plasma spiked with (A) LEV at 50  $\mu\text{g/mL}$  [QC medium level], (B) UCB L057 at 50  $\mu\text{g/mL}$  [QC medium level] and (C) IS.**

doi:10.1371/journal.pone.0111544.g002

## 2.2 LC-MS/MS instrumentation and conditions

Analysis of LEV and UCB L057 was performed using an Agilent 1100 HPLC system equipped with a binary solvent pump, an autosampler, a column oven and a degasser (Agilent Technologies, Palo Alto, CA, USA). The HPLC system was connected to an AB Sciex API 3000 triple quadrupole mass spectrometer (AB Sciex Instruments, New Jersey, USA) equipped with a Turbo Ion Spray source. Chromatographic data analysis was performed by Analyst software (Version 1.4.2).

The chromatographic separation of LEV, UCB L057 and IS was performed on an Agilent Zorbax SB-C18 (2.1 mm  $\times$  100 mm, 3.5  $\mu\text{m}$ ) column mounted with a Supelco replacement frit (0.5  $\mu\text{m}$  pore size) with an isocratic elution. The mobile phase consists of a mixture of 0.1% formic acid in water and ACN (40:60 v/v). The flow rate was kept constant at 0.5 mL/min while the temperature of the column oven was maintained at 35°C. The injection volume is 0.010 mL and the assay run time is 2 minutes.

Mass spectral analysis was performed on a positive electrospray ionization mode with the following parameters: source temperature of 450°C, ion spray voltage at 5,000 V, nitrogen as the nebulizer gas. The flow of nebulizing gas, curtain gas, and collision gas were at instrument settings of 8, 8, and 4, respectively. The optimized settings of mass spectrometer voltage and the retention time for each analyte are presented in Table 1.

## 2.3 Sample preparation

Samples were prepared by a simple and direct protein precipitation. To 0.050 mL of sample was added 0.450 mL of precipitating solution containing 1  $\mu\text{g/mL}$  of IS in ACN. The mixture was vortex mixed for 20 s, and then centrifuged at 15,900  $\times g$  for 5 min. A 0.100 mL of the clear supernatant was

transferred into a clean microcentrifuge tube containing 0.400 mL of UHQ water. A 0.010 mL of the final mixture in a dilution of 1:50, was then directly introduced into the chromatographic system after mixing.

## 2.4 Method validation

The assay method was validated according to the requirements as outlined in guidelines established by the US Food and Drug Administration (US FDA) [42] and the European Medicines Agency (EMA) [43].

## 2.5 Collection and storage of plasma samples from patients

This assay method was applied to an analysis of LEV and its metabolite in plasma samples collected from adult patients with epilepsy. These patients were recruited to participate in a population pharmacokinetic study at the University of Malaya Medical Centre (UMMC) in Malaysia. The study protocol was reviewed and approved by the UMMC Medical Ethics Committee (Approval Reference No. 890.31) and was carried out in accordance with the Declaration of Helsinki and guidelines for Good Clinical Practice. Written informed consent was obtained from a patient or a next-of-kin of a patient before enrollment in the study. Blood samples were collected from an intravenous cannula before an oral prescribed LEV dose and at 15, 30, 60 min, 2, 3.5 and 5 h after an oral administration. Venous blood samples in lithium heparin tubes were centrifuged at 900  $\times g$  for 10 min and the plasma were extracted and transferred into clean cryo vials and immediately stored at  $-20^\circ\text{C}$  until analysis.

**Table 2.** The accuracy and precision of intra-assay and inter-assay for each analyte.

| Compounds | Level                         | Intra-assay (7 samples) |                               |        | Inter-assay (7 runs) |                               |        |
|-----------|-------------------------------|-------------------------|-------------------------------|--------|----------------------|-------------------------------|--------|
|           |                               | Accuracy (%)            | Imprecision                   | CV (%) | Accuracy (%)         | Imprecision                   | CV (%) |
|           |                               |                         | Measured ( $\mu\text{g/mL}$ ) |        |                      | Measured ( $\mu\text{g/mL}$ ) |        |
| LEV       | QCLOQ (0.5 $\mu\text{g/mL}$ ) | 94.51                   | 0.47 $\pm$ 0.04               | 9.13   | 100.21               | 0.50 $\pm$ 0.04               | 8.14   |
|           | QCL (1.5 $\mu\text{g/mL}$ )   | 102.80                  | 1.54 $\pm$ 0.08               | 5.15   | 104.41               | 1.57 $\pm$ 0.12               | 7.37   |
|           | QCM (50 $\mu\text{g/mL}$ )    | 99.80                   | 49.81 $\pm$ 3.81              | 7.65   | 98.94                | 49.51 $\pm$ 3.77              | 7.62   |
|           | QCH (90 $\mu\text{g/mL}$ )    | 108.86                  | 98.11 $\pm$ 3.65              | 3.72   | 97.80                | 88.03 $\pm$ 8.21              | 9.33   |
| UCB L057  | QCLOQ (0.5 $\mu\text{g/mL}$ ) | 92.13                   | 0.46 $\pm$ 0.02               | 4.87   | 98.52                | 0.49 $\pm$ 0.04               | 8.71   |
|           | QCL (1.5 $\mu\text{g/mL}$ )   | 100.51                  | 1.51 $\pm$ 0.09               | 5.85   | 106.15               | 1.59 $\pm$ 0.13               | 8.31   |
|           | QCM (50 $\mu\text{g/mL}$ )    | 104.36                  | 52.20 $\pm$ 2.46              | 4.71   | 100.82               | 50.43 $\pm$ 3.77              | 7.47   |
|           | QCH (90 $\mu\text{g/mL}$ )    | 99.11                   | 89.29 $\pm$ 6.39              | 7.16   | 94.50                | 85.03 $\pm$ 5.86              | 6.89   |

QCLOQ is QC at LLOQ concentration, QCL is QC at low concentration, QCM is QC at medium concentration and QCH is QC at high concentration. LEV is levetiracetam and UCB L057 is its carboxylic metabolite. CV is coefficient of variation and is expressed in percentage (%).  
doi:10.1371/journal.pone.0111544.t002

## Results and Discussion

### 3.1 Method development

As LEV lacks chromophores, the utilization of MS/MS detection method may be more feasible [19]. The quantification of LEV using mass spectrometry however, may be affected by the fact that both LEV and its carboxylic metabolite share the same product ion of the highest abundance ( $Q1/Q3$  transitions of 171.1>126.1 for LEV and 172.5>126.1 for UCB L057). Additionally, both LEV and UCB L057 may also co-elute and thus giving rise to falsely higher measured LEV concentrations [32]. Prior to this analytical method report, there was only one other assay method that enables the separation and simultaneous quantification of LEV and UCB L057 [32]. The authors separated LEV from its carboxylic metabolite chromatographically by having a mobile phase of pH close to 2.5 with 0.1% formic acid. This acid condition keeps the metabolite in a non ionized form to retain it longer in an analytical column.

The same product ions for both LEV and UCB L057 were not selected. The product ion of the second highest abundance for LEV ( $Q1/Q3$  transitions of 171.1>154.1) was chosen for multiple reaction monitoring (MRM) instead. There was no compromise to the sensitivity for LEV. All analytes were eluted in less than 1 min, permitting an injection-to-injection cycle time of 2.0 min. The developed method provides a stable retention time for all analytes without the need to stringently control the pH of the mobile phase. Representative chromatograms of medium quality control (QCM) at 50  $\mu\text{g/mL}$  of both LEV and UCB L057 as well as IS, with their respective retention time, are shown in Figure 2.

### 3.2 Method validation

**3.2.1 Limit of detection (LOD) and lower limit of quantification (LLOQ).** The LOD and LLOQ were expressed as a ratio of signal to noise ( $S/N$ )  $\geq 3$  and  $\geq 5$ , respectively. The LLOQs for both LEV and UCB L057 were validated at 0.5  $\mu\text{g/mL}$ , while the LOD was 0.25  $\mu\text{g/mL}$  for both analytes.

**3.2.2 Selectivity.** Six different sources of blank plasma were processed to check for interference from endogenous compounds. The effects of hemolyzed blood and commonly used additives in blood tubes such as lithium heparin, ethylenediaminetetraacetic acid (EDTA) and citric acid were investigated. When the chromatograms of extracted drug-free plasma were overlaid with those of extracted spiked plasma samples, no significant peak interferences were observed at the respective retention times of LEV and UCB L057. The calculated percentage interferences were less than 15% of the LLOQ for both analytes and 0.2% for the IS, which is acceptable according to the requirements stated in EMA [43]. Similarly, no peak interferences were observed for the studied hemolyzed matrix and additives matrix containing lithium heparin, EDTA and citric acid.

**3.2.3 Calibration curve and linearity.** A  $1/x^2$  weighted linear regression model was performed using the Analyst software to construct the calibration curve of both LEV and UCB L057. The calibration curves were linear over a working range between 0.5 and 100  $\mu\text{g/mL}$  for both analytes and the regression coefficients ( $r^2$ ) of all calibration curves were more than 0.990. The current calibrated range is clearly wider than the recommended LEV therapeutic range of 12 to 46  $\mu\text{g/mL}$  [11]. Previous pharmacokinetic studies involving an administration of a single, low dose of LEV reported low UCB L057 concentrations of less than 5  $\mu\text{g/mL}$  [27,28,41]. In the present assay method, a wider calibration range for UCB L057 was also determined to support

**Table 3.** Recovery and matrix effects for each analyte.

| Level | Nominal conc. ( $\mu\text{g/mL}$ ) | Compounds | Recovery (n = 6) |        | Matrix effects (n = 7) |        |
|-------|------------------------------------|-----------|------------------|--------|------------------------|--------|
|       |                                    |           | Percentage       | CV (%) | Percentage             | CV (%) |
| QCL   | 1.5                                | LEV       | 107.72           | 4.60   | 100.97                 | 13.38  |
|       |                                    | UCB L057  | 103.08           | 5.81   | 94.02                  | 13.36  |
|       |                                    | IS        | 100.93           | 2.30   | 93.68                  | 8.30   |
| QCM   | 50                                 | LEV       | 105.30           | 3.12   | -                      | -      |
|       |                                    | UCB L057  | 105.07           | 3.81   | -                      | -      |
|       |                                    | IS        | 101.74           | 2.00   | -                      | -      |
| QCH   | 100                                | LEV       | 101.12           | 2.14   | 95.99                  | 14.90  |
|       |                                    | UCB L057  | 102.44           | 1.60   | 92.60                  | 13.44  |
|       |                                    | IS        | 100.12           | 4.37   | 110.06                 | 12.76  |

QCLOQ is QC at LLOQ concentration, QCL is QC at low concentration, QCM is QC at medium concentration and QCH is QC at high concentration. LEV is levetiracetam and UCB L057 is its carboxylic metabolite. CV is coefficient of variation and is expressed in percentage (%).

doi:10.1371/journal.pone.0111544.t003

future pharmacokinetic studies on LEV in various clinical settings; for example, an unexpected accumulation of UCB L057 due to prolonged elimination in patients with renal impairment or when larger doses of LEV are used in status epilepticus.

**3.2.4 Accuracy and precision.** The accuracy and precision of the assay method were established at four concentration points of the calibration curve: at 0.5  $\mu\text{g/mL}$  (QC at LLOQ, QCLLOQ), 1.5  $\mu\text{g/mL}$  (QC at low level, QCL), 50  $\mu\text{g/mL}$  (QC at medium level, QCM) and 90  $\mu\text{g/mL}$  (QC at high level, QCH). The intra-assay accuracy and precision were determined by measuring seven replicates of each of the spiked QC samples in a single analytical run. For inter-assay accuracy and precision, the calculated concentrations for all 4 levels of QC samples from 7 independent cycles were used. The accuracy and precision of both intra-assay and inter-assay were all within the acceptance criteria set by the US FDA and the EMA (Table 2).

**3.2.5 Recovery and matrix effects.** Recovery represents the extraction efficiency of an analytical method while matrix effects are the combined interference with the ionization process in a mass spectrometer of all components of a sample other than the analytes of interest. Extracted pooled blank plasma (6 replicates) was used for the assessment of recovery at QCL, QCM and QCH while matrix effects were investigated with 7 lots of individual blank plasma at QCL and QCH, and calculated for each lot of matrix for each analyte. Both LEV and UCB L057 were spiked at 1:50 ratio into extracted blank plasma and blank reagent (ACN:H<sub>2</sub>O, 18:82, v/v) containing IS and were used as a comparison for the assessment of recovery and matrix effects.

The following formulas were applied to calculate the recovery (RE) and the matrix effect (ME):

$$\text{RE}(\%) = (A / B) \times 100$$

$$\text{ME}(\%) = (B / C) \times 100$$

where A is the peak height of a pre extraction spiked standard, B is the peak height of a post extraction spiked standard at a 1:50

dilution ratio, and C is the peak height of analyte spiked in a standard solution at a 1:50 dilution ratio.

As shown in Table 3, the accuracy and imprecision for all analytes in recovery study were within the acceptance limits of the US FDA [42]. The matrix effects remained consistent between various sources of plasma with a CV of less than 15% and therefore would not adversely affect the accuracy and precision of the assay method.

**3.2.6 Stability.** The stability of LEV and UCB L057 were carried out by comparing the measured concentrations of samples under short-term or long-term storage, or various conditions resembling the actual sample preparation before analysis, against those of freshly prepared samples. No significant difference in concentrations was observed between these batches (Table 4).

**3.2.7 Carryover.** The carryover effect was evaluated by injecting the highest concentration of the calibration standard (100  $\mu\text{g/mL}$ ) followed by a blank reagent (ACN:H<sub>2</sub>O, 18:82, v/v) for 3 replicates. The carryover from both LEV and UCB L057 was acceptable at less than 6% of the LLOQ and 0.13% of the IS.

**3.2.8 Dilution integrity.** Since the plasma concentrations of LEV and UCB L057 from patient samples may exceed the highest established linearity range, sample dilution procedure may be necessary. Dilution integrity of 1:2 and 1:4 was investigated by diluting a 0.025 mL of spiked plasma sample at two folds the concentration of QCH (180  $\mu\text{g/mL}$ ) of LEV and UCB L057 with 0.025 mL of blank plasma or a 0.0125 mL of this spiked plasma with 0.0375 mL of blank plasma, respectively before extraction. The inaccuracy and imprecision were within the limit of 15%.

### 3.3 Clinical applications

This validated assay method was applied to a population pharmacokinetic study to determine the concentrations of LEV and UCB L057 simultaneously in 318 plasma samples contributed by 50 patients aged between 18 and 64 years, weighing between 38.6 and 93 kg and receiving LEV doses between 0.5 and 4.5 g per day. The simultaneous measurement of plasma concentrations of the parent compound of LEV and its metabolite allows a more in depth evaluation of the pharmacokinetic profile of LEV. The extent of conversion from the parent compound to its metabolite



**Table 4.** Stability study for each analyte.

| Stability test       | Storage condition      | Matrix           | LEV             |                |                | UCB L057        |                |                |
|----------------------|------------------------|------------------|-----------------|----------------|----------------|-----------------|----------------|----------------|
|                      |                        |                  | QCL [1.5 µg/mL] | QCM [50 µg/mL] | QCH [90 µg/mL] | QCL [1.5 µg/mL] | QCM [50 µg/mL] | QCH [90 µg/mL] |
| Stock solution (n=6) | 6 hours at RT          | Reagent          | -               | +5.39          | -              | +1.71           | -              | -              |
|                      | 2 months in -20°C      | Reagent          | -               | -4.42          | -              | -9.58           | -              | -              |
| Bench top (n=4)      | 4 hours at RT          | Plasma           | +2.92           | -              | -8.89          | -1.50           | -              | -11.08         |
|                      | Freeze-thaw (3 cycles) | Plasma           | +0.17           | -              | -3.44          | +6.00           | -              | +1.42          |
| Long term (n=4)      | 1 week in -20°C        | Plasma           | +7.11           | -              | +2.74          | -8.89           | -              | +0.63          |
|                      | 2 months in -20°C      | Plasma           | +8.67           | -              | -2.19          | -3.33           | -              | -1.64          |
| Auto-sample (n=4)    | 24 hours at RT         | Extracted plasma | +1.56           | -              | +9.86          | -9.11           | -              | -2.97          |

QCLOQ is QC at LLOQ concentration, QCL is QC at low concentration, QCM is QC at medium concentration and QCH is QC at high concentration. LEV is levetiracetam and UCB L057 is its carboxylic metabolite. CV is coefficient of variation and is expressed in percentage (%). RT is room temperature. The presented data in this table are calculated as % deviation (% CV).  
 \*Analytes and IS are spiked into reagent at 1:50 dilution ratio.  
 doi:10.1371/journal.pone.0111544.t004

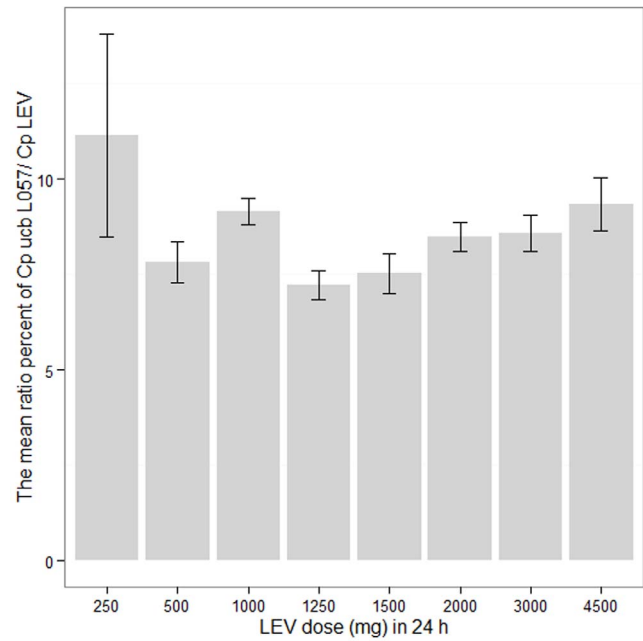

**Figure 3.** Mean and standard error of mean (SEM) of the ratio percent of plasma concentrations of UCB L057/LEV at various dosing regimens.  
 doi:10.1371/journal.pone.0111544.g003

as well as the systemic eliminations of both compounds in patients with various pathophysiological conditions can then be assessed.

The mean plasma concentrations of UCB L057 were low compared with that of LEV. Figure 3 depicts the mean and standard error of mean (SEM) of the ratio percent of plasma concentrations of UCB L057/LEV at various dosing regimens. The mean ratio percent of plasma concentrations of UCB L057 at  $T_{max}$  of LEV over  $C_{max}$  of LEV was 6.7% (SD  $\pm$  2.2%). This value is higher than the 3% [41,44] or 5% [45] value reported in previous LEV pharmacokinetic studies in children where a single dose or multiple doses of LEV were administered. The difference in our study may be due to a different assay method used, a more mature liver metabolic function in adults and the co-administration of other antiepileptic agents that are enzyme inducers. The profiles of plasma concentrations versus time after last dose from 6 sample patients receiving various dosing regimens of LEV are depicted in Figure 4.

**Conclusion**

A simple method for the simultaneous determination of plasma concentrations of LEV and UCB L057 using LC-MS/MS was developed and validated to be used in a population pharmacokinetic study or other clinical studies in patients with epilepsy. The current assay method requires a relatively small sample volume of 0.050 mL, involves a simple and fast sample preparation, as well as a short assay run time of 2 min. This assay method has also been subjected to thorough validation processes and meets the standards as outlined by the requirements of both the US FDA and the EMA.

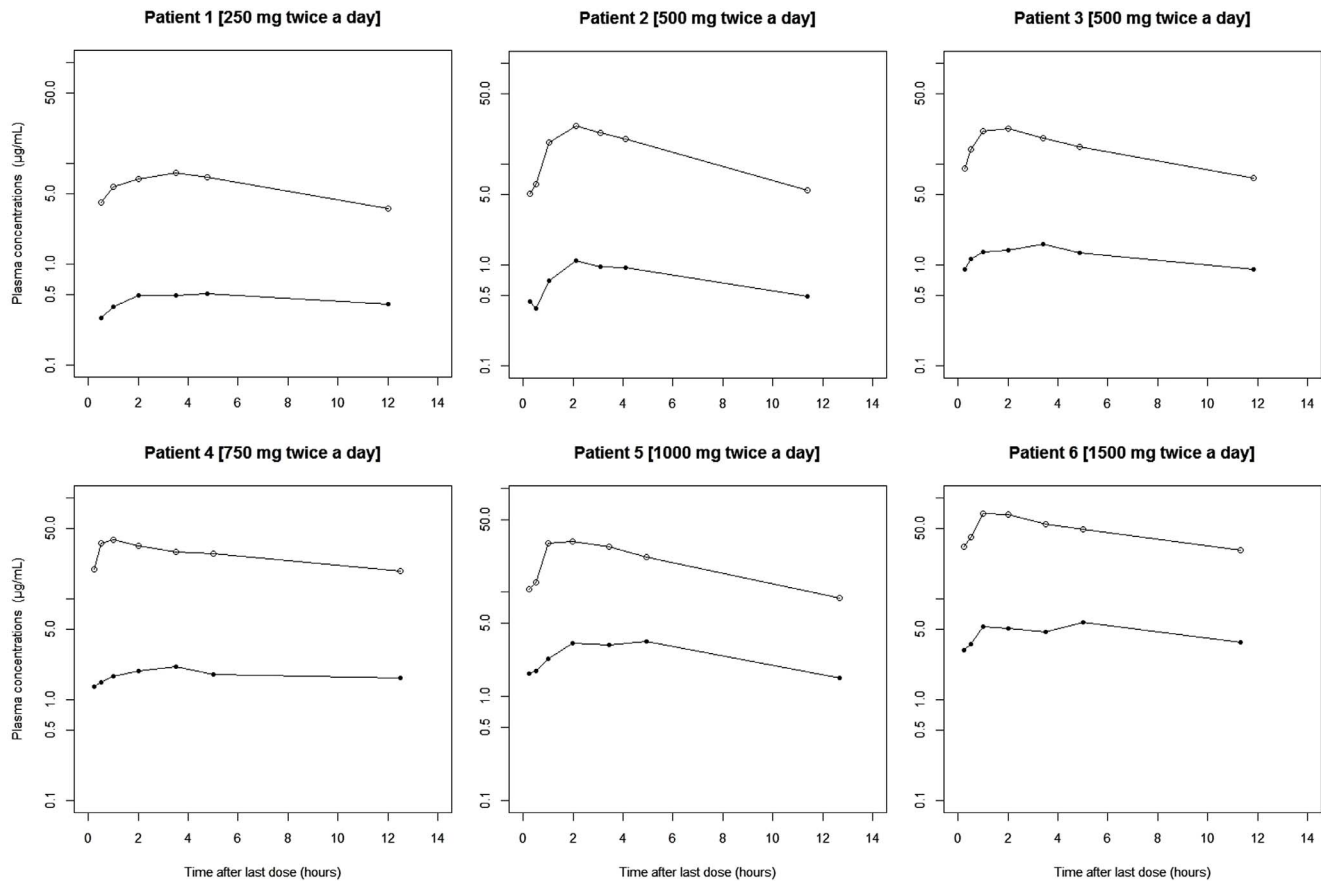

**Figure 4. Representative semi-log plots of plasma concentrations of LEV (○) and UCB L057 (●) versus time after last dose of 6 patients with epilepsy on maintenance dose of oral LEV.**

doi:10.1371/journal.pone.0111544.g004

## Supporting Information

**Table S1 Mean, SD and SEM of plasma concentrations of LEV and UCB L057, with corresponding total daily LEV dose.**

(DOCX)

**Table S2 Data of the pre- and post-dose plasma concentrations of LEV and UCB L057 from 6 patients with epilepsy as presented in Figure 4.**

(DOCX)

## References

- (2011) Keppra: Prescribing Information [Product Insert]. Smyrna, GA: UCB.
- Patsalos PN (2000) Pharmacokinetic profile of levetiracetam: toward ideal characteristics. *Pharmacol Ther* 85: 77–85.
- Patsalos PN (2003) The pharmacokinetic characteristics of levetiracetam. *Methods Find Exp Clin Pharmacol* 25: 123–129.
- Patsalos PN (2004) Clinical pharmacokinetics of levetiracetam. *Clin Pharmacokinet* 43: 707–724.
- Patsalos PN, Ghattaura S, Ratnaraj N, Sander JW (2006) In situ metabolism of levetiracetam in blood of patients with epilepsy. *Epilepsia* 47: 1818–1821.
- May TW, Rambeck B, Jurgens U (2003) Serum concentrations of Levetiracetam in epileptic patients: the influence of dose and co-medication. *Ther Drug Monit* 25: 690–699.
- Patsalos PN (2013) Drug interactions with the newer antiepileptic drugs (AEDs)—part 1: pharmacokinetic and pharmacodynamic interactions between AEDs. *Clin Pharmacokinet* 52: 927–966.
- Patsalos PN (2013) Drug interactions with the newer antiepileptic drugs (AEDs)—Part 2: pharmacokinetic and pharmacodynamic interactions between AEDs and drugs used to treat non-epilepsy disorders. *Clin Pharmacokinet* 52: 1045–1061.
- Lancelin F, Franchon E, Kraoul L, Garciau I, Brovedani S, et al. (2007) Therapeutic drug monitoring of levetiracetam by high-performance liquid chromatography with photodiode array ultraviolet detection: preliminary observations on correlation between plasma concentration and clinical response in patients with refractory epilepsy. *Ther Drug Monit* 29: 576–583.
- Kaufman KR, Bisen V, Zimmerman A, Tobia A, Mani R, et al. (2013) Apparent dose-dependent levetiracetam-induced de novo major depression with suicidal behavior. *Epilepsy & Behavior Case Reports* 1: 110–112.
- Patsalos PN, Berry DJ, Bourgeois BF, Cloyd JC, Glauser TA, et al. (2008) Antiepileptic drugs—best practice guidelines for therapeutic drug monitoring: a position paper by the subcommission on therapeutic drug monitoring, ILAE Commission on Therapeutic Strategies. *Epilepsia*. 2008/04/10 ed. pp. 1239–1276.
- Reineks EZ, Lawson SE, Lembright KE, Wang S (2011) Performance characteristics of a new levetiracetam immunoassay and method comparison with a high-performance liquid chromatography method. *Ther Drug Monit* 33: 124–127.

## Acknowledgments

We acknowledge Pharmaniaga Ltd (Selangor, Malaysia) for providing the pure diphenhydramine standards used for the development of this method. We want to express our gratitude to Dr Tong-Chow Lee, Mr Pang-Seng Tan and Ms Atiqah binti Tahziz for their technical assistance.

## Author Contributions

Conceived and designed the experiments: LLY YLL. Performed the experiments: LLY. Analyzed the data: LLY YLL. Contributed reagents/materials/analysis tools: LLY YLL. Wrote the paper: LLY YLL.

13. Shah NM, Hawwa AF, Millership JS, Collier PS, McElnay JC (2013) A simple bioanalytical method for the quantification of antiepileptic drugs in dried blood spots. *J Chromatogr B Analyt Technol Biomed Life Sci* 923–924: 65–73.
14. Olah E, Bacsó G, Fekete J, Sharma VK (2012) Determination of ng/mL levetiracetam using ultra-high-performance liquid chromatography-photodiode absorbance. *J Chromatogr Sci* 50: 253–258.
15. Antonilli L, Brusadin V, Filippini F, Guglielmi R, Nencini P (2011) Development and validation of an analytical method based on high performance thin layer chromatography for the simultaneous determination of lamotrigine, zonisamide and levetiracetam in human plasma. *J Pharm Biomed Anal* 56: 763–770.
16. Zufia L, Aldaz A, Ibanez N, Giraldez J, Viteri C (2010) LC method for therapeutic drug monitoring of levetiracetam: evaluation of the assay performance and validation of its application in the routine area. *Clin Biochem* 43: 473–482.
17. Contin M, Mohamed S, Albani F, Riva R, Baruzzi A (2008) Simple and validated HPLC-UV analysis of levetiracetam in deproteinized plasma of patients with epilepsy. *J Chromatogr B Analyt Technol Biomed Life Sci* 873: 129–132.
18. Juenke J, Brown PI, Urry FM, McMillin GA (2006) Drug monitoring and toxicology: a procedure for the monitoring of levetiracetam and zonisamide by HPLC-UV. *J Anal Toxicol* 30: 27–30.
19. Martens-Lobenhoffer J, Bode-Boger SM (2005) Determination of levetiracetam in human plasma with minimal sample pretreatment. *J Chromatogr B Analyt Technol Biomed Life Sci* 819: 197–200.
20. Pucci V, Bugamelli F, Mandrioli R, Ferranti A, Kennedler E, et al. (2004) High-performance liquid chromatographic determination of Levetiracetam in human plasma: comparison of different sample clean-up procedures. *Biomed Chromatogr* 18: 37–44.
21. Grim SA, Ryan M, Miles MV, Tang PH, Strawsburg RH, et al. (2003) Correlation of levetiracetam concentrations between serum and saliva. *Ther Drug Monit* 25: 61–66.
22. Ratnaraj N, Doheny HC, Patsalos PN (1996) A micromethod for the determination of the new antiepileptic drug levetiracetam (ucb LO59) in serum or plasma by high performance liquid chromatography. *Ther Drug Monit* 18: 154–157.
23. Vermey TA, Edelbroek PM (1994) High-performance liquid chromatographic and megabore gas-liquid chromatographic determination of levetiracetam (ucb L059) in human serum after solid-phase extraction. *J Chromatogr B Biomed Appl* 662: 134–139.
24. Can NO, Arli G (2010) Reversed-phase HPLC analysis of levetiracetam in tablets using monolithic and conventional C18 silica columns. *J AOAC Int* 93: 1077–1085.
25. Mecarelli O, Li Voti P, Pro S, Romolo FS, Rotolo M, et al. (2007) Saliva and serum levetiracetam concentrations in patients with epilepsy. *Ther Drug Monit* 29: 313–318.
26. Isoherranen N, Roeder M, Soback S, Yagen B, Schurig V, et al. (2000) Enantioselective analysis of levetiracetam and its enantiomer R- $\alpha$ -ethyl-2-oxo-pyrrolidine acetamide using gas chromatography and ion trap mass spectrometric detection. *J Chromatogr B Biomed Sci Appl* 745: 325–332.
27. Brockmoller J, Thomsen T, Wittstock M, Coupez R, Lochs H, et al. (2005) Pharmacokinetics of levetiracetam in patients with moderate to severe liver cirrhosis (Child-Pugh classes A, B, and C): characterization by dynamic liver function tests. *Clin Pharmacol Ther* 77: 529–541.
28. Coupez R, Nicolas JM, Browne TR (2003) Levetiracetam, a new antiepileptic agent: lack of in vitro and in vivo pharmacokinetic interaction with valproic acid. *Epilepsia* 44: 171–178.
29. Ivanova M, Pionti A, Marziali E, Komarova N, Raggi MA, et al. (2003) Microemulsion electrokinetic chromatography applied for separation of levetiracetam from other antiepileptic drugs in polypharmacy. *Electrophoresis* 24: 992–998.
30. Luo W, Kong ST, Yang S, Chan BC, Ho PC (2013) A simple assay for determination of levetiracetam in rat dried blood spots by LC-MS/MS. *Bioanalysis* 5: 1843–1851.
31. Collins JA, Janis GC (2012) Analysis of selected anticonvulsants by high performance liquid chromatography-tandem mass spectrometry. *Methods Mol Biol* 902: 201–209.
32. Mendu DR, Soldin SJ (2010) Simultaneous determination of levetiracetam and its acid metabolite (ucb L057) in serum/plasma by liquid chromatography tandem mass spectrometry. *Clin Biochem* 43: 485–489.
33. Matar KM (2008) Quantification of levetiracetam in human plasma by liquid chromatography-tandem mass spectrometry: application to therapeutic drug monitoring. *J Pharm Biomed Anal* 48: 822–828.
34. Kim KB, Seo KA, Kim SE, Bae SK, Kim DH, et al. (2011) Simple and accurate quantitative analysis of ten antiepileptic drugs in human plasma by liquid chromatography/tandem mass spectrometry. *J Pharm Biomed Anal* 56: 771–777.
35. Guo T, Oswald LM, Mendu DR, Soldin SJ (2007) Determination of levetiracetam in human plasma/serum/saliva by liquid chromatography-electrospray tandem mass spectrometry. *Clin Chim Acta* 375: 115–118.
36. Jain DS, Subbaiah G, Sanyal M, Pal U, Shrivastav PS (2006) Determination of levetiracetam in human plasma by liquid chromatography/electrospray tandem mass spectrometry and its application to bioequivalence studies. *Rapid Commun Mass Spectrom* 20: 2539–2547.
37. Kuhn J, Knabbe C (2013) Fully validated method for rapid and simultaneous measurement of six antiepileptic drugs in serum and plasma using ultra-performance liquid chromatography-electrospray ionization tandem mass spectrometry. *Talanta* 110: 71–80.
38. Shibata M, Hashi S, Nakanishi H, Masuda S, Katsura T, et al. (2012) Detection of 22 antiepileptic drugs by ultra-performance liquid chromatography coupled with tandem mass spectrometry applicable to routine therapeutic drug monitoring. *Biomed Chromatogr* 26: 1519–1528.
39. Juenke JM, Brown PI, Johnson-Davis KL, McMillin GA (2011) Simultaneous quantification of levetiracetam and gabapentin in plasma by ultra-pressure liquid chromatography coupled with tandem mass spectrometry detection. *Ther Drug Monit* 33: 209–213.
40. Blonk MI, van der Nagel BC, Smit LS, Mathot RA (2010) Quantification of levetiracetam in plasma of neonates by ultra performance liquid chromatography-tandem mass spectrometry. *J Chromatogr B Analyt Technol Biomed Life Sci* 878: 675–681.
41. Pellock JM, Glauser TA, Bebin EM, Fountain NB, Ritter FJ, et al. (2001) Pharmacokinetic study of levetiracetam in children. *Epilepsia* 42: 1574–1579.
42. Food and Drug Administration Center for Drug Evaluation and Research (CDER) (2001) Guidance for industry: bioanalytical method validation. US Department of Health and Human Services. FDA Maryland.
43. European Medicines Agency (2011) Guideline on bioanalytical method validation. EMA London.
44. Glauser TA, Mitchell WG, Weinstock A, Bebin M, Chen D, et al. (2007) Pharmacokinetics of levetiracetam in infants and young children with epilepsy. *Epilepsia* 48: 1117–1122.
45. Fountain NB, Conry JA, Rodriguez-Leyva I, Gutierrez-Moctezuma J, Salas E, et al. (2007) Prospective assessment of levetiracetam pharmacokinetics during dose escalation in 4- to 12-year-old children with partial-onset seizures on concomitant carbamazepine or valproate. *Epilepsy Res* 74: 60–69.
